# Supplementary material for: Homeostatic controllers compensating for growth and perturbations
Source: PubMed Central journal article supplement (PMC6690524; doi:10.1371/journal.pone.0207831), 2019-08-12
Supplement: pone.0207831.s002.pdf [file pone.0207831.s002.pdf]

Supporting Material, File S1 Text

Homeostatic Controllers Compensating for  
Growth and Perturbations

P. Ruoff<sup>1\*</sup>, O. Agafonov<sup>1</sup>, D. M. Tveit<sup>2</sup>, K. Thorsen<sup>2</sup>, T. Drenstig<sup>2</sup>

<sup>1</sup>Centre for Organelle Research

<sup>2</sup>Department of Electrical Engineering and Computer Science,  
University of Stavanger, Stavanger, Norway

\*Corresponding author. Address: Centre for Organelle Research, University of Stavanger, N-4036 Stavanger, Norway, Tel.: (47) 5183-1887, Fax: (47) 5183-1750, E-mail: peter.ruoff@uis.no

## Steady state of cell-internal-generated compound $A$ without negative feedback

Integrating  $\dot{V}=k_1$  from  $V_0$  to  $V(t)$  and from time zero to time  $t$  gives

$$V(t) = k_1 t + V_0 \quad (\text{S1})$$

Inserting Eq. S1 into the equation  $\dot{E} = -E\dot{V}/V$  (Eq. 10), we get

$$\dot{E} = -E \left( \frac{k_1}{k_1 t + V_0} \right) = -E \left( \frac{1}{t + \alpha} \right) \quad (\text{S2})$$

where  $\alpha = V_0/k_1$ . Separation of variables gives

$$\frac{dE}{E} = \frac{dt}{t + \alpha} \quad (\text{S3})$$

Integrating from time zero to  $t$  and from  $E_0$  to  $E(t)$  we get

$$\ln \left( \frac{E}{E_0} \right) = \ln \left( \frac{\alpha}{\alpha + t} \right) \Rightarrow E = E_0 \left( \frac{\alpha}{\alpha + t} \right) \quad (\text{S4})$$

Inserting  $E$  from Eq. S4 into the rate equation for  $A$  (Eq. 11)

$$\dot{A} = k_2 \cdot E - A \cdot \frac{\dot{V}}{V} = k_2 \cdot E - A \cdot \frac{k_1}{V_0 + k_1 \cdot t} = k_2 \cdot E - A \cdot \frac{1}{\alpha + t} \quad (\text{S5})$$

we get the following rate equation for  $A$

$$\dot{A} + \frac{A}{\alpha + t} = k_2 E_0 \left( \frac{\alpha}{\alpha + t} \right) \quad (\text{S6})$$

The solution of Eq. S6 is given by Eq. 11, i.e.,

$$A(t) = k_2 E_0 \alpha + (A_0 - k_2 E_0 \alpha) \left( \frac{\alpha}{\alpha + t} \right) \quad (\text{S7})$$
