# Supplementary material for: Homeostatic controllers compensating for growth and perturbations
Source: PubMed Central journal article supplement (PMC6690524; doi:10.1371/journal.pone.0207831), 2019-08-12
Supplement: pone.0207831.s003.pdf [file pone.0207831.s003.pdf]

Supporting Material, File S2 Text

Homeostatic Controllers Compensating for  
Growth and Perturbations

P. Ruoff<sup>1\*</sup>, O. Agafonov<sup>1</sup>, D. M. Tveit<sup>2</sup>, K. Thorsen<sup>2</sup>, T. Drenstig<sup>2</sup>

<sup>1</sup>Centre for Organelle Research

<sup>2</sup>Department of Electrical Engineering and Computer Science,  
University of Stavanger, Stavanger, Norway

\*Corresponding author. Address: Centre for Organelle Research, University of Stavanger, N-4036 Stavanger, Norway, Tel.: (47) 5183-1887, Fax: (47) 5183-1750, E-mail: peter.ruoff@uis.no

## Steady state of transporter-generated compound $A$ without negative feedback

We start with Eq. 15 where transporter  $T$  pumps external  $A$  ( $A_{ext}$ ) into a constantly growing cell ( $\dot{V}=\text{constant}$ )

$$\dot{A} = \frac{k_2 \cdot T}{V} - A \left( \frac{\dot{V}}{V} \right) \quad (\text{S1})$$

We assume that the surface concentration of  $T$  is constant and that the pump rate is zero-order with respect to the external  $A$  concentration.

The steady state of  $A$  is given by setting Eq. S1 to zero, which gives

$$\dot{A} = \frac{k_2 \cdot T}{V} - A \left( \frac{\dot{V}}{V} \right) = 0 \quad \Rightarrow \quad A_{ss} = \frac{k_2 \cdot T}{\dot{V}} \quad (\text{S2})$$

independent of the initial concentration of  $A$ .

In case there is a first-order removal of cellular  $A$  with respect to  $A$  the rate equation becomes

$$\dot{A} = \frac{k_2 \cdot T}{V} - k_3 \cdot A - A \left( \frac{\dot{V}}{V} \right) = 0 \quad (\text{S3})$$

Setting Eq. S3 to zero leads to

$$A_{ss} = \frac{k_2 \cdot T}{k_3 V + \dot{V}} \rightarrow 0 \quad \text{as} \quad V \rightarrow \infty \quad (\text{S4})$$

In case the removal of cellular  $A$  is zero-order with respect to  $A$  (for example by an enzyme removing  $A$  at maximum velocity  $V_{max}$ ), then in this case the steady state condition

$$\dot{A} = \frac{k_2 \cdot T}{V} - V_{max} - A \left( \frac{\dot{V}}{V} \right) = 0 \quad (\text{S5})$$

gives

$$A_{ss} = \frac{1}{\dot{V}} (k_2 \cdot T - V_{max} \cdot V) \quad (\text{S6})$$

As the volume  $V$  grows there will be a critical volume  $V_{crit} = k_2 T / V_{max}$  at which  $A_{ss}$  becomes zero.
