# Supplementary material for: Homeostatic controllers compensating for growth and perturbations
Source: PubMed Central journal article supplement (PMC6690524; doi:10.1371/journal.pone.0207831), 2019-08-12
Supplement: pone.0207831.s004.pdf [file pone.0207831.s004.pdf]

Supporting Material, File S3 Text

Homeostatic Controllers Compensating for  
Growth and Perturbations

P. Ruoff<sup>1\*</sup>, O. Agafonov<sup>1</sup>, D. M. Tveit<sup>2</sup>, K. Thorsen<sup>2</sup>, T. Drenstig<sup>2</sup>

<sup>1</sup>Centre for Organelle Research

<sup>2</sup>Department of Electrical Engineering and Computer Science,  
University of Stavanger, Stavanger, Norway

\*Corresponding author. Address: Centre for Organelle Research, University of Stavanger, N-4036 Stavanger, Norway, Tel.: (47) 5183-1887, Fax: (47) 5183-1750, E-mail: peter.ruoff@uis.no

## Steady states and theoretical set-point for motif 1 zero-order controller

### Transporter-based compensatory flux with constant values of $\dot{V}$ and $k_3$

The rate equations for  $A$  and  $E$  when the compensatory flux is transporter based, are

$$\dot{A} = \frac{k_2 E}{V} - k_3 \cdot A - A \left( \frac{\dot{V}}{V} \right) \quad (\text{S1})$$

$$\dot{E} = k_4 - k_6 \cdot A - E \left( \frac{\dot{V}}{V} \right) \quad (\text{S2})$$

with  $\frac{M}{k_5+M} = \frac{E}{k_7+E} = 1$  (see Eq. 16). For constant  $V$  ( $\dot{V}=0$ ) and  $k_3$  ( $\dot{k}_3=0$ ), Eq. S2 defines the theoretical set-point, i.e.

$$\dot{E} = k_4 - k_6 \cdot A - A \left( \frac{\dot{V}}{V} \right) = 0 \quad \Rightarrow \quad A_{ss} = A_{set}^{theor} = \frac{k_4}{k_6} \quad (\text{S3})$$

As long as  $\frac{E}{k_7+E} = 1$  the controller will for any step-wise perturbation in  $k_3$  or  $V$  move  $A_{ss}$  to  $A_{set}^{theor}$ .

However, for constant  $\dot{V}$  and  $k_3$ , Eq. S3 is no longer valid. In case the volume  $V$  increases linearly,  $E$  needs to increase in order to oppose the dilution of  $A$ . To get an estimate of  $A_{ss}$  for constant  $\dot{V}$  and  $k_3$ , we take the double time derivative of  $A$ , and set  $\ddot{A}$  and  $\dot{A}$  to zero

$$\ddot{A} = \frac{k_2 \dot{E}}{V} - \frac{k_2 E \dot{V}}{V^2} - \dot{k}_3 A + A \left( \frac{\dot{V}}{V} \right)^2 = 0 \quad (\text{S4})$$

Inserting Eq. S2 into Eq. S4 gives

$$\frac{k_2}{V} \left[ k_4 - k_6 \cdot A - E \left( \frac{\dot{V}}{V} \right) \right] - k_2 \cdot E \left( \frac{\dot{V}}{V^2} \right) - \dot{k}_3 A + A \left( \frac{\dot{V}}{V} \right)^2 = 0 \quad (\text{S5})$$

Multiplying Eq. S5 with  $V$  leads to

$$k_2k_4 - k_2k_6 \cdot A - 2k_2E \left( \frac{\dot{V}}{V} \right) - \underbrace{k_3A \cdot V + A \left( \frac{\dot{V}^2}{V} \right)}_{\rightarrow 0} = 0 \quad (\text{S6})$$

Assuming steady state conditions in Eq. S1 and neglecting there the  $A\dot{V}/V$  term we can approximately write

$$\dot{A} = \frac{k_2E}{V} - k_3 \cdot A - A \left( \frac{\dot{V}}{V} \right) = 0 \quad \Rightarrow \quad \frac{k_2E}{V} = k_3 \cdot A_{ss} \quad (\text{S7})$$

with  $E$  and  $V$  increasing. Inserting the right-hand side of Eq. S7 into Eq. S6 gives

$$k_2k_4 - k_2k_6 \cdot A_{ss} - 2k_3A_{ss}\dot{V} - k_3A_{ss} \cdot V = 0 \quad (\text{S8})$$

Solving for  $A_{ss}$ , we get

$$A_{ss} = \frac{k_2k_4}{k_2k_6 + 2k_3\dot{V} + k_3V} \quad (\text{S9})$$

In phase 2 of Fig. 7 we have  $\dot{k}_3=0$ . For  $k_2=2.0$ ,  $k_3=2.0$ ,  $k_4=20.0$ ,  $k_6=10.0$ , and  $\dot{V}=2.0$ ,  $A_{ss}$  is calculated after Eq. S9 to be 1.25, while the numerical value of  $A_{ss}$  is 1.11. When in phase 3 (Fig. 7)  $\dot{k}_3=1.0$ , Eq. S9 indicates, as observed, that  $A_{ss}$  will go to zero as  $V$  increases.

### Cell-internal compensatory flux with constant values of $\dot{V}$ and $\dot{k}_3$

Rate equations for  $A$  and  $E$  (Eqs. 50 and 51) are written as

$$\dot{A} = k_3 \cdot E - k_3 \cdot A - A \left( \frac{\dot{V}}{V} \right) \quad (\text{S10})$$

$$\dot{E} = k_4 - k_6 \cdot A - E \left( \frac{\dot{V}}{V} \right) \quad (\text{S11})$$

by using  $N/(k_7+N)=M/(k_5+M)=1$ . In addition,  $E/(k_8+E)=1$  giving the controller ideal behavior/precision for step-wise perturbations in  $k_3$  and  $V$ . Calculating  $\ddot{A}$  and setting  $\ddot{A}$  and  $\dot{A}$  to zero, gives

$$\ddot{A}=k_2\cdot\dot{E}-\dot{k}_3A+A\left(\frac{\dot{V}}{V}\right)^2=k_2\left[k_4-k_6\cdot A-E\left(\frac{\dot{V}}{V}\right)\right]-\dot{k}_3A+A\left(\frac{\dot{V}}{V}\right)^2=0 \quad (\text{S12})$$

Neglecting the  $\dot{V}/V$  terms (steady state when time  $t$  and volume  $V$  become large) leads to Eq. 53

$$k_2k_4=k_2k_6A_{ss}+\dot{k}_3A_{ss} \Rightarrow A_{ss}=\frac{k_2k_4}{k_2k_6+\dot{k}_3} \quad (\text{S13})$$

Model calculations at the end of phase 3 in Fig. 18 ( $k_2=1.0$ ,  $k_4=20.0$ ,  $k_6=10.0$ , and  $\dot{k}_3=1.0$ ) show an  $A_{ss}=1.75$ , while the estimated value from Eq. S13 gives a value of 1.82.
