# Supplementary material for: Homeostatic controllers compensating for growth and perturbations
Source: PubMed Central journal article supplement (PMC6690524; doi:10.1371/journal.pone.0207831), 2019-08-12
Supplement: pone.0207831.s005.pdf [file pone.0207831.s005.pdf]

Supporting Material, File S4 Text

Homeostatic Controllers Compensating for  
Growth and Perturbations

P. Ruoff<sup>1\*</sup>, O. Agafonov<sup>1</sup>, D. M. Tveit<sup>2</sup>, K. Thorsen<sup>2</sup>, T. Drenstig<sup>2</sup>

<sup>1</sup>Centre for Organelle Research

<sup>2</sup>Department of Electrical Engineering and Computer Science,  
University of Stavanger, Stavanger, Norway

\*Corresponding author. Address: Centre for Organelle Research, University of Stavanger, N-4036 Stavanger, Norway, Tel.: (47) 5183-1887, Fax: (47) 5183-1750, E-mail: peter.ruoff@uis.no

**Steady states and theoretical set-point for motif 1 second-order (antithetic) controller**

**Transporter-based compensatory flux with constant values of  $\dot{V}$  and  $k_3$**

The rate equations (Eqs. 21-23) are written as

$$\dot{A} = \frac{k_2 E_2}{V} - k_3 \cdot A - A \left( \frac{\dot{V}}{V} \right) \quad (\text{S1})$$

$$\dot{E}_1 = k_4 \cdot A - k_6 \cdot E_1 \cdot E_2 - E_1 \left( \frac{\dot{V}}{V} \right) \quad \text{with} \quad \frac{M}{k_5 + M} = 1 \quad (\text{S2})$$

$$\dot{E}_2 = k_8 - k_6 \cdot E_1 \cdot E_2 - E_2 \left( \frac{\dot{V}}{V} \right) \quad \text{with} \quad \frac{O}{k_9 + O} = 1 \quad (\text{S3})$$

By setting  $\dot{E}_1=0$  and neglecting the dilution term (considering  $V \gg \dot{V}$ ) steady state conditions require

$$k_4 \cdot A = k_6 \cdot E_1 \cdot E_2 \quad (\text{S4})$$

Calculating the double time derivative of  $A$  and setting it and  $\dot{A}$  to zero gives

$$\ddot{A} = \frac{k_2 \dot{E}_2}{V} - \frac{k_2 E_2 \dot{V}}{V^2} - \dot{k}_3 \cdot A + A \left( \frac{\dot{V}}{V} \right)^2 = 0 \quad (\text{S5})$$

Inserting  $\dot{E}_2$  from Eq. S3 into Eq. S5

$$\ddot{A} = \frac{k_2}{V} \left[ k_8 - \underbrace{k_6 \cdot E_1 \cdot E_2}_{k_4 \cdot A} - E_2 \left( \frac{\dot{V}}{V} \right) \right] - \frac{k_2 E_2 \dot{V}}{V^2} - \dot{k}_3 \cdot A + A \left( \frac{\dot{V}}{V} \right)^2 = 0 \quad (\text{S6})$$

Multiplying Eq. S6 by  $V$  yields

$$\ddot{A} = k_2 \left[ k_8 - k_4 \cdot A - E_2 \left( \frac{\dot{V}}{V} \right) \right] - \frac{k_2 E_2}{V} \cdot \dot{V} - \underbrace{k_3 \cdot A \cdot V}_{\approx 0} + A \left( \frac{\dot{V}^2}{V} \right) = 0 \quad (\text{S7})$$

giving

$$k_2 k_8 - k_2 k_4 \cdot A_{ss} - 2 \cdot \underbrace{\frac{k_2 E_2}{V}}_{k_3 \cdot A_{ss}} \cdot \dot{V} - k_3 \cdot A_{ss} \cdot V = 0 \quad (\text{S8})$$

using the steady state condition from Eq. S1 that  $k_2 E_2 / V = k_3 A_{ss}$ . Solving for  $A_{ss}$  gives

$$A_{ss} = \frac{k_2 k_8}{k_2 k_4 + 2 k_3 \dot{V} + k_3 V} \quad (\text{S9})$$

which is analogous to the  $A_{ss}$  expression for the motif 1 zero-order controller (see S3 Text, Eq. S9). As for the motif 1 zero-order controller  $A_{ss}$  will go to zero for the antithetic controller when  $k_3 \neq 0$  (Fig. 9, phase 3).

### Cell-internal-based compensatory flux with constant values of $\dot{V}$ and $k_3$

The rate equation for  $A$  with an cell internal compensatory flux is given by

$$\dot{A} = k_2 E_2 - k_3 \cdot A - A \left( \frac{\dot{V}}{V} \right) \quad (\text{S10})$$

where in Eq. S6  $N/(k_7+N)$  is set to 1.0. The rate equations for  $E_1$  and  $E_2$  are as given by Eqs. S2 and S3, respectively.

Calculating  $\ddot{A}$  from Eq. S10 gives

$$\ddot{A} = k_2 \dot{E}_2 - \dot{k}_3 \cdot A + A \left( \frac{\dot{V}}{V} \right)^2 = 0 \quad (\text{S11})$$

Inserting  $\dot{E}_2$  from Eq. S3 into Eq. S11 gives

$$k_2 \left[ k_8 - \underbrace{k_6 \cdot E_1 \cdot E_2}_{k_4 \cdot A_{ss}} - E_2 \underbrace{\left( \frac{\dot{V}}{V} \right)}_{\rightarrow 0} \right] - \dot{k}_3 \cdot A_{ss} + A_{ss} \underbrace{\left( \frac{\dot{V}}{V} \right)}_{\rightarrow 0}^2 = 0 \quad (\text{S12})$$

Collecting the  $A_{ss}$  terms and observing that  $\dot{V}/V \rightarrow 0$ , we get

$$k_2 k_8 = k_2 k_4 \cdot A_{ss} + \dot{k}_3 A_{ss} \quad \Rightarrow \quad A_{ss} = \frac{k_2 k_8}{k_2 k_4 + \dot{k}_3} \quad (\text{S13})$$

Note, that also in case of a cell-internal generated compensatory flux the steady state expressions for  $A$  for the motif 1 zero-order and the antithetic controllers show the same behaviors (compare S3 Text Eq. S13) with Eq. S13 above.
