# Supplementary material for: Homeostatic controllers compensating for growth and perturbations
Source: PubMed Central journal article supplement (PMC6690524; doi:10.1371/journal.pone.0207831), 2019-08-12
Supplement: pone.0207831.s007.pdf [file pone.0207831.s007.pdf]

Supporting Material, File S6 Text

Homeostatic Controllers Compensating for  
Growth and Perturbations

P. Ruoff<sup>1\*</sup>, O. Agafonov<sup>1</sup>, D. M. Tveit<sup>2</sup>, K. Thorsen<sup>2</sup>, T. Drenstig<sup>2</sup>

<sup>1</sup>Centre for Organelle Research

<sup>2</sup>Department of Electrical Engineering and Computer Science,  
University of Stavanger, Stavanger, Norway

\*Corresponding author. Address: Centre for Organelle Research, University of Stavanger, N-4036 Stavanger, Norway, Tel.: (47) 5183-1887, Fax: (47) 5183-1750, E-mail: peter.ruoff@uis.no

## Steady states and theoretical set-point for motif 2 zero-order controller

### Transporter-based compensatory flux with constant values of $\dot{V}$ and $k_3$

We refer to the rate equations for  $A$  and  $E$  (Eqs. 43-44), which are written in the following form:

$$\dot{A} = \frac{k_2 k_4}{k_4 + E} \cdot \frac{1}{V} - k_3 \cdot A - A \left( \frac{\dot{V}}{V} \right) \quad (\text{S1})$$

$$\dot{E} = k_8 \cdot A - k_9 - E \left( \frac{\dot{V}}{V} \right) \quad (\text{S2})$$

by setting in Eq. 44  $M/(k_{11}+M)=E/(k_{10}+E)=1$ .

Calculating  $\ddot{A}$  gives

$$\ddot{A} = -\frac{k_2 k_4}{(k_4 + E)^2} \cdot \frac{\dot{E}}{V} - \left( \frac{k_2 k_4}{k_4 + E} \right) \frac{\dot{V}}{V^2} - \dot{k}_3 A + A \left( \frac{\dot{V}}{V} \right)^2 \quad (\text{S3})$$

Inserting Eq. S2 into Eq. S3 leads to

$$\ddot{A} = -\frac{k_2 k_4}{(k_4 + E)^2} \cdot \frac{1}{V} \left[ k_8 \cdot A - k_9 - E \left( \frac{\dot{V}}{V} \right) \right] - \left( \frac{k_2 k_4}{k_4 + E} \right) \frac{\dot{V}}{V^2} - \dot{k}_3 A + A \left( \frac{\dot{V}}{V} \right)^2 \quad (\text{S4})$$

Multiplying Eq. S4 by  $V(k_4 + E)^2 / (k_2 k_4)$  gives

$$\ddot{A} = -k_8 A + k_9 + E \left( \frac{\dot{V}}{V} \right) - (k_4 + E) \left( \frac{\dot{V}}{V} \right) - \dot{k}_3 A \cdot \frac{V(k_4 + E)^2}{k_2 k_4} + A \left( \frac{\dot{V}}{V} \right)^2 \cdot \frac{V(k_4 + E)^2}{k_2 k_4} \quad (\text{S5})$$

Setting the  $\dot{V}/V$  terms in Eq. S5 to zero we get

$$\ddot{A} = -k_8 A + k_9 - \dot{k}_3 A \cdot \frac{V(k_4 + E)^2}{k_2 k_4} \quad (\text{S6})$$

Setting Eq. S1 to zero and neglecting the  $\dot{V}/V$  terms gives the relationship between decreasing  $E$  and increasing  $V$  and  $k_3$  to keep  $A$  at a constant steady state  $A_{ss}$ , i.e.

$$\frac{k_2 k_4}{(k_4 + E) \cdot V} = k_3 A_{ss} \quad \Rightarrow \quad (k_4 + E)^2 = \frac{(k_2 k_4)^2}{k_3^2 A_{ss}^2 V^2} \quad (\text{S7})$$

Inserting  $(k_2 k_4)^2$  from Eq. S7 into Eq. S6 and setting  $\ddot{A}=0$  gives

$$A_{ss} = \underbrace{\frac{k_9}{k_8}}_{A_{set}^{theor}} - \underbrace{\frac{\dot{k}_3 k_2 k_4}{k_3^2 A_{ss} V}}_{\text{offset}} \quad (\text{S8})$$

For constant  $\dot{k}_3$  and increasing values of  $V$  and  $k_3$  the offset term  $\dot{k}_3 k_2 k_4 / k_3^2 A_{ss} V$  goes to zero and  $A_{ss}$  is kept by the controller at its theoretical set-point  $A_{set}^{theor} = k_9 / k_8$  as clearly seen in Fig. 13. Since a constant  $A_{ss}$  level by this controller type is maintained by decreasing  $E$  values the negative feedback loop will break when  $E$  becomes low and the controller reaches its capacity limits (Eq. 48).

### Cell-internal compensatory flux with constant values of $\dot{V}$ and $k_3$

In this case the rate equations (Eqs. 62-63) are written as

$$\dot{A} = \frac{k_4 k_6}{k_4 + E} - k_3 \cdot A - A \left( \frac{\dot{V}}{V} \right) \quad (\text{S9})$$

$$\dot{E} = k_8 \cdot A - k_9 - E \left( \frac{\dot{V}}{V} \right) \quad (\text{S10})$$

by setting  $N/(k_7+N)=E/(k_{10}+E)=M/(k_{11}+M)=1$ . Taking the second-time derivative  $\ddot{A}$  gives

$$\ddot{A} = -\frac{k_4 k_6}{(k_4+E)^2} \dot{E} - \dot{k}_3 A + A \left( \frac{\dot{V}}{V} \right)^2 \quad (\text{S11})$$

Inserting  $\dot{E}$  from Eq. S10 into Eq. S11

$$\ddot{A} = -\frac{k_4 k_6}{(k_4+E)^2} \left[ k_8 \cdot A - k_9 - E \left( \frac{\dot{V}}{V} \right) \right] - \dot{k}_3 A + A \left( \frac{\dot{V}}{V} \right)^2 \quad (\text{S12})$$

Setting Eq. S9 to zero and neglecting the  $\dot{V}/V$  term, we have the condition how  $E$  has to decrease for increasing  $k_3$  to keep  $A$  constant at  $A_{ss}$ , i.e.,

$$\frac{k_4 k_6}{(k_4+E)} = k_3 A_{ss} \quad \Rightarrow \quad (k_4+E)^2 = \frac{(k_4 k_6)^2}{k_3^2 A_{ss}^2} \quad (\text{S13})$$

Substituting  $(k_4+E)^2$  in Eq. S11 by  $(k_4 k_6)^2/k_3^2 A_{ss}^2$ , setting the resulting equation to zero, and neglecting the  $\dot{V}/V$  terms, leads to

$$A_{ss} = \frac{k_9}{k_8} - \frac{\dot{k}_3 k_4 k_6}{k_3^2 k_8 A_{ss}} \quad (\text{S14})$$

where  $A_{set}^{theor} = k_9/k_8$  and the offset term is zero for  $\dot{k}_3=0$ , and goes to zero when  $\dot{k}_3$  is constant and  $k_3$  increases.

### Cell-internal compensatory flux with exponential increase of $\dot{V}$ and $\dot{k}_3$

i) Exponential increase in  $V$  and constant  $k_3$  (phase 2). We start again with the rate equations

$$\dot{A} = \frac{k_4 k_6}{k_4+E} - k_3 \cdot A - A \left( \frac{\dot{V}}{V} \right) \quad (\text{S9})$$

$$\dot{E} = k_8 \cdot A - k_9 - E \left( \frac{\dot{V}}{V} \right) \quad (\text{S2})$$

In the case  $\dot{k}_3=0$ , but  $V$  increases exponentially, say  $\dot{V}=\kappa V$ ,  $A_{ss}$  and  $E_{ss}$  show constant value, where  $A_{ss}$  shows an offset above  $A_{set}^{theor}$  (overcompensation). The steady state in  $A$  can be calculated by setting Eq. S2 to zero, i.e.,

$$A_{ss} = \underbrace{\frac{k_9}{k_8}}_{A_{set}^{theor}} + \underbrace{\frac{\kappa}{k_8} E_{ss}}_{\text{overcompensated offset}} \quad (\text{S15})$$

ii) Exponential increase in  $V$  and  $k_3$  (phase 3). Assuming that  $\dot{V}=\kappa V$  and  $\dot{k}_3=\zeta k_3$  with  $\kappa$  and  $\zeta$  constants, we can calculate  $\ddot{A}$

$$\ddot{A} = -\frac{k_4 k_6}{(k_4 + E)^2} \dot{E} - \dot{k}_3 A \quad (\text{S16})$$

assuming that  $\dot{A}=0$ . Inserting Eq. S2 (note that  $\dot{V}/V=\kappa$ ) into Eq. S16 and setting Eq. S16 to zero gives the expression for the steady state of  $A$ ,  $A_{ss}$ ,

$$-\frac{k_4 k_6}{(k_4 + E)^2} [k_8 \cdot A_{ss} - k_9 - \kappa \cdot E] - \dot{k}_3 A_{ss} = 0 \quad (\text{S17})$$

leading to

$$A_{ss} = -\frac{k_4 k_6}{k_3 (k_4 + E)^2} [k_8 \cdot A_{ss} - k_9 - \kappa \cdot E] \quad (\text{S18})$$

Note, that while  $A$  is in a steady state,  $E$  is decreasing (derepressing) in order to increase the compensatory flux. Eq. S18 can be rewritten as

$$A_{ss} = - \frac{k_4 k_6 k_8}{\underbrace{k_3(k_4 + E)^2}_{\gamma_0}} \left[ A_{ss} - \underbrace{\frac{k_9}{k_8}}_{A_{set}^{theor}} - \underbrace{\frac{\kappa}{k_8} E}_{\text{overcompensated offset}} \right] \quad (S19)$$

where  $A_{set}^{apparent}$  is an "apparent set-point". Thus, Eq. S19 can be written as

$$A_{ss} = -\gamma_0(A_{ss} - A_{set}^{app}) \Rightarrow A_{ss} = \left( \frac{\gamma_0}{1 + \gamma_0} \right) A_{set}^{app} \quad (S20)$$

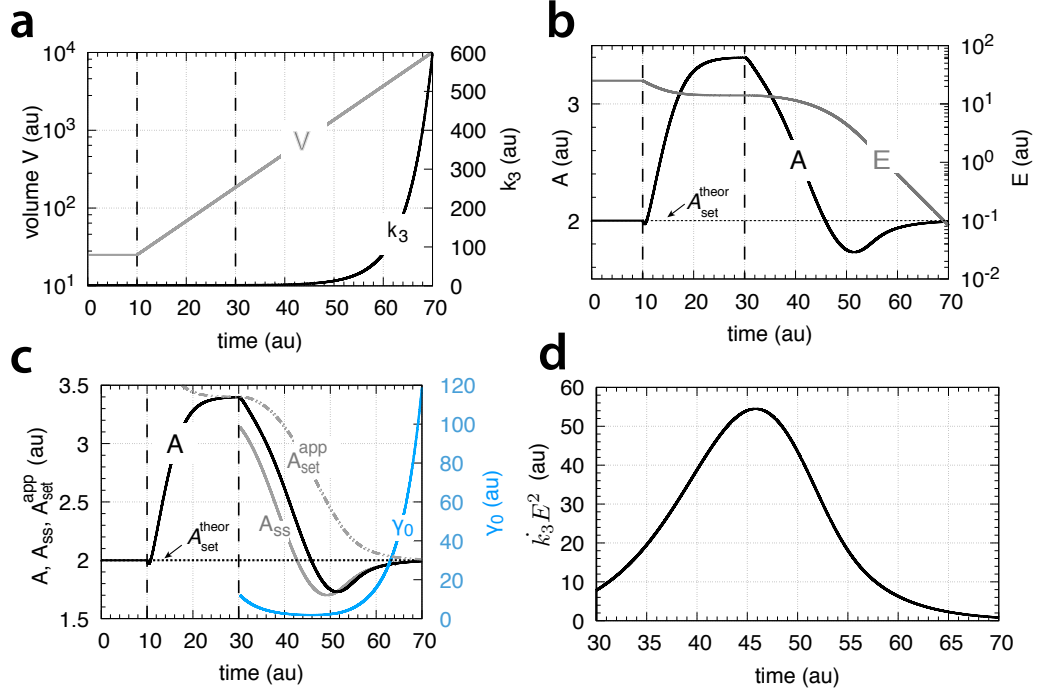

**Figure S1.** (a) Perturbation profile of  $V$  and  $k_3$  (same figure as Fig. 14). (b) Response of controller (same results as in Fig. 25d). (c) Behaviors of  $A_{ss}$  and  $A_{set}^{app}$  as a function of time (Eq. S20). (d) By the end of phase 3  $E^2$  decreases more rapidly than the exponential increase of  $k_3$ , which is indicated by the product  $k_3 E^2$  going to zero.

Fig. S1c shows how  $\gamma_0$  and  $A_{set}^{app}$  changes with respect to the controller's behavior when exposed to exponential increase in  $V$  and  $k_3$  with the response shown in Fig. 25d. For convenience the perturbation profile and the controller's response are repeated in Figs. S1a and b. The derepression by decreasing  $E$  leads to an increase in  $\gamma_0$  (Fig. S1c, curve outlined in blue). The increase in  $\gamma_0$  is the result of  $E^2$  decreasing more rapidly than the exponential increase of  $k_3$ . This is indicated in Fig. S1 where the product  $k_3 E^2$  during phase 3 decreases and  $A_{ss} \rightarrow A_{set}^{theor}$ .
